# Supplementary material for: Potential photosensitization of oral squamous cell carcinoma through photobiomodulation
Source: Research Square preprint supplement (doi:10.21203/rs.3.rs-6787647/v1), 2025-07-01
Supplement: Supplementary file 1 [file 475fbf3109328bcc0e946917.docx]

Table 3 - Genes codes

|  | **ASSAY TAQMAN MOUSE** | | | |
| --- | --- | --- | --- | --- |
|  | **GENE** | **SIZE** | CATALOG | DESCRIPTION |
|
| 1 | Caspase 3 | 250rxns | 4331182 | Mm01195085_m1 |
| 2 | BAX | 250rxns | 4331182 | Mm00432051_m1 |
| 3 | Ki67 | 250rxns | 4331182 | Mm01278617_m1 |
| 4 | mmp2 | 75rxns | 4453320 | Mm00439498_m1 |
| 5 | vegf | 250rxns | 4331182 | Mm00437306_m1 |
| 6 | rn18s | 750rxns | 4351370 | Mm03928990_m1 |
